# Supplementary material for: Virulence and Antimicrobial Resistance Profiles of Shiga Toxin-Producing Escherichia coli from River Water and Farm Animal Feces near an Agricultural Region in Northwestern Mexico
Source: MDPI journal article supplement (doi:10.3390/microbiolres15010026), 2024-03-08
Supplement: s1 [file s1]

**Table S1.** Antimicrobial agents used in the present study.

| Class of antimicrobial                      | Antimicrobial agent           | Abbreviation | Concentration (µg) | Minimum inhibitory concentration (MIC) interpretive criteria (µg/ml) <sup>1</sup> |              |           |
|---------------------------------------------|-------------------------------|--------------|--------------------|-----------------------------------------------------------------------------------|--------------|-----------|
|                                             |                               |              |                    | Sensitive                                                                         | Intermediate | Resistant |
| Aminoglycosides                             | Amikacin                      | AMK          | 30                 | ≤ 16                                                                              | 32           | ≥ 64      |
|                                             | Gentamicin                    | GEN          | 10                 | ≤ 4                                                                               | 8            | ≥ 16      |
|                                             | Kanamycin                     | KAN          | 30                 | ≤ 16                                                                              | 32           | ≥ 64      |
| β-Lactamase Inhibitors                      | Amoxicillin - Clavulanic Acid | AMC          | 20/10              | ≤ 8/4                                                                             | 16/8         | ≥ 32/16   |
| Carbapenems                                 | Imipenem                      | IPM          | 10                 | ≤ 1                                                                               | 2            | ≥ 4       |
| Cephalosporins (1 <sup>st</sup> generation) | Cephalothin                   | CEF          | 30                 | ≤ 8                                                                               | 16           | ≥ 16      |
| Fluoroquinolones                            | Ciprofloxacin                 | CIP          | 5                  | ≤ 1                                                                               | 2            | ≥ 4       |
| Lipopeptide                                 | Colistin                      | CST          | 10                 | ≤ 2                                                                               | 4            | ≥ 8       |
| Penicillins                                 | Ampicillin                    | AMP          | 10                 | ≤ 8                                                                               | 16           | ≥ 32      |
| Phenicol                                    | Chloramphenicol               | CHL          | 30                 | ≤ 8                                                                               | 16           | ≥ 32      |
| Quinolones                                  | Nalidixic Acid                | NAL          | 30                 | ≤ 16                                                                              | -            | ≥ 32      |
| Sulfonamides                                | Trimethoprim-Sulfamethoxazole | SXT          | 23.75/1.25         | ≤ 2/38                                                                            | -            | ≥ 4/76    |
| Tetracyclines                               | Tetracycline                  | TET          | 30                 | ≤ 4                                                                               | 8            | ≥ 16      |

<sup>1</sup> MIC interpreted criteria according to guidelines provided by the Clinical and Laboratory Standards Institute, Document M100-S24.

**Table S2.** Antimicrobial minimum inhibitory concentration (MIC) values of STEC isolates examined in this study.

| Strain name | Source        | Site          | Antimicrobial MIC Values (µg/ml) <sup>1</sup> |      |      |                 |     |     |     |      |     |      |      |        |      |
|-------------|---------------|---------------|-----------------------------------------------|------|------|-----------------|-----|-----|-----|------|-----|------|------|--------|------|
|             |               |               | AMC                                           | AMK  | AMP  | CEF             | CHL | CIP | CST | GEN  | IPM | KAN  | NAL  | SXT    | TET  |
| BAAL1102    | River water   | Jotagua       | ≤ 8/4                                         | ≤ 16 | ≤ 8  | 16 <sup>b</sup> | ≤ 8 | ≤ 1 | ≤ 2 | ≤ 4  | ≤ 1 | ≤ 16 | ≤ 16 | ≤ 2/38 | ≤ 4  |
| BAAL1103    | River water   | Jotagua       | ≤ 8/4                                         | ≤ 16 | ≤ 8  | ≤ 8             | ≤ 8 | ≤ 1 | ≤ 2 | ≤ 4  | ≤ 1 | ≤ 16 | ≤ 16 | ≤ 2/38 | ≤ 4  |
| BAAL1104    | River water   | Jotagua       | ≤ 8/4                                         | ≤ 16 | 16   | ≤ 8             | ≤ 8 | ≤ 1 | ≤ 2 | ≤ 4  | ≤ 1 | ≤ 16 | ≤ 16 | ≥ 4/76 | ≤ 4  |
| BAAL1105    | Chicken feces | Jotagua       | ≤ 8/4                                         | ≥ 64 | ≤ 8  | ≤ 8             | ≤ 8 | ≥ 4 | ≤ 2 | ≥ 64 | ≤ 1 | ≤ 16 | ≤ 16 | ≤ 2/38 | ≤ 4  |
| BAAL1106    | Chicken feces | Jotagua       | ≤ 8/4                                         | ≤ 16 | ≤ 8  | ≤ 8             | ≤ 8 | ≥ 4 | ≤ 2 | ≤ 4  | ≥ 4 | ≥ 64 | ≤ 16 | ≤ 2/38 | ≤ 4  |
| BAAL1107    | Chicken feces | Jotagua       | ≤ 8/4                                         | ≤ 16 | ≤ 8  | ≤ 8             | ≤ 8 | ≤ 1 | ≤ 2 | 8    | ≤ 1 | ≤ 16 | ≤ 16 | ≤ 2/38 | ≤ 4  |
| BAAL1108    | Cattle feces  | Jotagua       | ≤ 8/4                                         | ≤ 16 | ≤ 8  | ≤ 8             | ≤ 8 | ≥ 4 | ≤ 2 | ≤ 4  | ≤ 1 | ≤ 16 | ≥ 32 | ≤ 2/38 | ≥ 16 |
| BAAL1110    | Cattle feces  | Jotagua       | ≤ 8/4                                         | ≤ 16 | ≤ 8  | ≥ 64            | ≤ 8 | ≤ 1 | ≤ 2 | ≤ 4  | ≤ 1 | ≤ 16 | ≤ 16 | ≤ 2/38 | ≤ 4  |
| BAAL1111    | Cattle feces  | Jotagua       | ≤ 8/4                                         | ≤ 16 | ≤ 8  | 16 <sup>b</sup> | ≤ 8 | ≤ 1 | ≤ 2 | ≤ 4  | ≤ 1 | ≤ 16 | ≤ 16 | ≤ 2/38 | ≤ 4  |
| BAAL1112    | Cattle feces  | Jotagua       | ≤ 8/4                                         | ≤ 16 | ≤ 8  | ≤ 8             | ≤ 8 | ≤ 1 | ≤ 2 | ≤ 4  | ≤ 1 | ≤ 16 | ≤ 16 | ≤ 2/38 | ≤ 4  |
| BAAL1113    | Cattle feces  | Jotagua       | ≤ 8/4                                         | ≤ 16 | ≤ 8  | ≤ 8             | ≤ 8 | ≤ 1 | ≤ 2 | ≤ 4  | ≤ 1 | 32   | ≤ 16 | ≤ 2/38 | ≤ 4  |
| BAAL1114    | Cattle feces  | Jotagua       | ≤ 8/4                                         | ≤ 16 | ≤ 8  | ≤ 8             | ≤ 8 | ≤ 1 | ≤ 2 | ≤ 4  | ≤ 1 | ≤ 16 | ≤ 16 | ≤ 2/38 | ≤ 4  |
| BAAL1115    | Cattle feces  | Jotagua       | ≤ 8/4                                         | ≤ 16 | ≤ 8  | ≤ 8             | ≤ 8 | ≤ 1 | ≤ 2 | ≤ 4  | ≤ 1 | 32   | ≤ 16 | ≤ 2/38 | ≥ 16 |
| BAAL1116    | Cattle feces  | Agua Caliente | ≤ 8/4                                         | ≤ 16 | ≤ 8  | ≤ 8             | ≤ 8 | ≤ 1 | ≤ 2 | ≤ 4  | ≤ 1 | 32   | ≤ 16 | ≤ 2/38 | ≤ 4  |
| BAAL1117    | Cattle feces  | Agua Caliente | ≤ 8/4                                         | ≤ 16 | ≤ 8  | 16              | ≤ 8 | ≤ 1 | ≤ 2 | ≤ 4  | ≤ 1 | 32   | ≤ 16 | ≤ 2/38 | ≤ 4  |
| BAAL1119    | Cattle feces  | Agua Caliente | ≤ 8/4                                         | ≤ 16 | 16   | 16              | 16  | ≤ 1 | ≤ 2 | ≤ 4  | ≤ 1 | 32   | ≤ 16 | ≤ 2/38 | ≥ 16 |
| BAAL1120    | River water   | San Pedro     | ≤ 8/4                                         | ≤ 16 | ≤ 8  | ≤ 8             | ≤ 8 | ≤ 1 | ≤ 2 | ≤ 4  | ≤ 1 | ≤ 16 | ≤ 16 | ≤ 2/38 | ≤ 4  |
| BAAL1121    | River water   | San Pedro     | ≤ 8/4                                         | ≤ 16 | ≤ 8  | ≥ 64            | ≤ 8 | ≤ 1 | ≤ 2 | 8    | ≤ 1 | 32   | ≤ 16 | ≤ 2/38 | ≤ 4  |
| BAAL1122    | Cattle feces  | San Pedro     | ≤ 8/4                                         | ≤ 16 | ≥ 32 | ≤ 8             | ≤ 8 | ≤ 1 | ≤ 2 | ≤ 4  | ≤ 1 | ≤ 16 | ≤ 16 | ≤ 2/38 | ≤ 4  |
| BAAL1123    | Cattle feces  | San Pedro     | ≤ 8/4                                         | ≤ 16 | ≤ 8  | ≤ 8             | ≤ 8 | ≤ 1 | ≤ 2 | ≤ 4  | ≤ 1 | ≤ 16 | ≤ 16 | ≤ 2/38 | ≥ 16 |
| BAAL1124    | Cattle feces  | San Pedro     | ≤ 8/4                                         | ≤ 16 | ≤ 8  | 16              | ≤ 8 | ≤ 1 | ≤ 2 | ≤ 4  | ≤ 1 | ≤ 16 | ≤ 16 | ≤ 2/38 | ≥ 16 |

<sup>1</sup> MIC value indicates a resistance or intermediate susceptibility to the tested antimicrobial, according to the guidelines of the Clinical and Laboratory Standards Institute, Document M100-S24. Abbreviations: AMC, Amoxicillin – clavulanic acid; AMK, Amikacin; AMP, Ampicillin; CEF, Cephalothin; CHL, Chloramphenicol; CIP, Ciprofloxacin; CST, Colistin; GEN, Gentamicin; IPM, Imipenem; KAN, Kanamycin; NAL, Nalidixic acid; SXT, Trimethoprim-sulfamethoxazole; TET, Tetracycline.
